# Supplementary material
Source: PubMed Central journal article supplement (PMC2141890)
Supplement: pnas_0706110104_13.pdf [file pnas_0706110104_13.pdf]

**Table 1. Complex formation reactions**

| Reaction                                                                                            |           | Rate coefficient (s <sup>-1</sup> ) |
|-----------------------------------------------------------------------------------------------------|-----------|-------------------------------------|
| $M + T \rightarrow TM$                                                                              | $k_{on}$  | 0.000025                            |
| $TM + C \rightarrow TMC$                                                                            | $k_3$     | 0.00004                             |
| $TMC + M \rightarrow TMCM$                                                                          | $k_3$     | 0.00004                             |
| $TMCM + T \rightarrow TMCMT$                                                                        |           |                                     |
| $TMC + TM \rightarrow TMCMT$                                                                        |           |                                     |
| $TM \rightarrow T + M$                                                                              | $k_{off}$ |                                     |
| <ul style="list-style-type: none"> <li>• <math>TAg \rightarrow T + Ag</math></li> </ul>             |           | 0.019                               |
| <ul style="list-style-type: none"> <li>• <math>TEg \rightarrow T + Eg</math></li> </ul>             |           | 100                                 |
| <ul style="list-style-type: none"> <li>• <math>TAnt \rightarrow T + Ant</math></li> </ul>           |           | 1                                   |
| $TMC \rightarrow TM + C$                                                                            | $k_{-3}$  | 0.0001                              |
| $TMC \rightarrow T + M + C$                                                                         | $k_{off}$ |                                     |
| <ul style="list-style-type: none"> <li>• <math>TAgC \rightarrow T + Ag + C</math></li> </ul>        |           | 0.019                               |
| <ul style="list-style-type: none"> <li>• <math>TEgC \rightarrow T + Eg + C</math></li> </ul>        |           | 100                                 |
| <ul style="list-style-type: none"> <li>• <math>TAntC \rightarrow T + Ant + C</math></li> </ul>      |           | 1                                   |
| $TMCM \rightarrow TMC + M$                                                                          | $k_{-3}$  | 0.0001                              |
| $TMCM \rightarrow TM + C + M$                                                                       | $k_{-3}$  | 0.0001                              |
| $TMCM \rightarrow T + M + C + M$                                                                    | $k_{off}$ |                                     |
| <ul style="list-style-type: none"> <li>• <math>TAgCM \rightarrow T + Ag + C + M</math></li> </ul>   |           | 0.019                               |
| <ul style="list-style-type: none"> <li>• <math>TEgCM \rightarrow T + Eg + C + M</math></li> </ul>   |           | 100                                 |
| <ul style="list-style-type: none"> <li>• <math>TAntCM \rightarrow T + Ant + C + M</math></li> </ul> |           | 1                                   |
| $TMCMT \rightarrow T + MCMT$                                                                        | $k_{off}$ |                                     |
| <ul style="list-style-type: none"> <li>• <math>TAgCMT \rightarrow T + AgCMT</math></li> </ul>       |           | 0.019                               |
| <ul style="list-style-type: none"> <li>• <math>TEgCMT \rightarrow T + EgCMT</math></li> </ul>       |           | 100                                 |
| <ul style="list-style-type: none"> <li>• <math>TAntCMT \rightarrow T + AntCMT</math></li> </ul>     |           | 1                                   |
| $TMCMT \rightarrow TMC + MT$                                                                        | $k_{-3}$  | 0.0001                              |
| $TMCMT \rightarrow TM + CMT$                                                                        | $k_{-3}$  | 0.0001                              |
| $TMCMT \rightarrow TMCM + T$                                                                        | $k_{off}$ |                                     |

|                                                         |  |       |
|---------------------------------------------------------|--|-------|
| • $\text{TMCAgT} \rightarrow \text{TMCAg} + \text{T}$   |  | 0.019 |
| • $\text{TMCEgT} \rightarrow \text{TMCEg} + \text{T}$   |  | 100   |
| • $\text{TMCAntT} \rightarrow \text{TMCAnt} + \text{T}$ |  | 1     |
|                                                         |  |       |

### Reactions

| Reaction                                               |                  | Rate coefficient ( $\text{s}^{-1}$ )                                                   |
|--------------------------------------------------------|------------------|----------------------------------------------------------------------------------------|
| $\text{Tpp}[n]\dots \rightarrow \text{Tpn}[n]\dots$    | $2k_{\text{dp}}$ | 0.14                                                                                   |
| $\text{Tpn}[n]\dots \rightarrow \text{Tnn}[n]\dots$    | $k_{\text{dp}}$  | 0.07                                                                                   |
| $\text{Tpp}[Z/Zp]\dots \rightarrow X$                  |                  | Dephosphorilation does not occur<br>(i.e ZAP70 protect $\zeta$ -chain phosphorilation) |
| $\text{Tpp}[Zp]\dots \rightarrow \text{Tpp}[Z]\dots$   | $k_{ZpZ1}$       | 0.001                                                                                  |
| $\text{Tpp}[Z/Zp]\dots \rightarrow \text{Tpp}[n]+Z/Zp$ | $k_{\text{dZ}}$  | 0.01                                                                                   |

| Reaction                                                                                |                      | Rate coefficient ( $\text{s}^{-1}$ ) |
|-----------------------------------------------------------------------------------------|----------------------|--------------------------------------|
| $\dots\text{C}^n[\text{Shp1P}]\dots \rightarrow \dots\text{C}^n[n]\dots + \text{Shp1P}$ | $k_{\text{CdeShp}}$  | 0.1                                  |
| $\dots\text{Cpn}[\text{Shp1P}]\dots \rightarrow \dots\text{Cnn}[\text{Shp1P}]\dots$     | $k_{\text{Cdeact1}}$ | 150                                  |
| $\dots\text{Cp}^?[\text{?}]\dots \rightarrow \dots\text{Cn}^?[\text{?}]\dots$           | $k_{\text{Cdeact2}}$ | 0.003                                |
| $\dots\text{C}^n[n]\dots \rightarrow \dots\text{C}^n[n]\dots$                           | $k_{\text{Cdeprot}}$ | 0.3                                  |

|                                                                                                        |                   |      |
|--------------------------------------------------------------------------------------------------------|-------------------|------|
| $\text{T}^?[\text{?}]\text{MCn}^?[\text{?}]\dots \rightarrow \text{TMCP}^?[\text{?}]\dots$             | $k_{\text{a}}$    | 0.2  |
| $\text{Tnn}[n]\text{MCn}^?[\text{?}]\dots \rightarrow \text{Tpn}[n]\text{MCn}^?[\text{?}]\dots$        | $2k_{\text{pT1}}$ | 0.08 |
| $\text{Tp}[_]\text{MCn}^?[\text{?}]\dots \rightarrow \text{Tpp}[_]\text{MCn}^?[\text{?}]\dots$         | $k_{\text{pT1}}$  | 0.04 |
| $\text{Tnn}[n]\text{MCp}^?[\text{?}]\dots \rightarrow \text{Tpn}[n]\text{MCp}^?[\text{?}]\dots$        | $2k_{\text{pT2}}$ | 0.4  |
| $\text{Tp}[_]\text{MCp}^?[\text{?}]\dots \rightarrow \text{Tpp}[_]\text{MCp}^?[\text{?}]\dots$         | $k_{\text{pT2}}$  | 0.2  |
| $\text{Tpp}[Z]\text{MCn}^?[\text{?}]\dots \rightarrow \text{Tpp}[Zp]\text{MCn}^?[\text{?}]\dots$       | $k_{\text{ZZp1}}$ | 0.04 |
| $\text{Tpp}[Z]\text{MCp}^?[\text{?}]\dots \rightarrow \text{Tpp}[Zp]\text{MCp}^?[\text{?}]\dots$       | $k_{\text{ZZp2}}$ | 0.1  |
| $\text{Tpp}[Zp]\text{MC}^n[\text{Shp1P}]\dots \rightarrow \text{Tpp}[Z]\text{MC}^n[\text{Shp1P}]\dots$ | $K_{ZpZ2}$        | 150  |

|                                     |            |          |
|-------------------------------------|------------|----------|
| $Z+Tpp[n]... \rightarrow Tpp[Z]...$ | $k_Z$      | 0.000005 |
| $Zp+Tpp[n]... \rightarrow Tpp[Zp]$  | $k_Z$      | 0.000005 |
| $...Zp... \rightarrow ...Z...$      | $k_{ZpZ1}$ | 0.001    |

|                                                            |               |           |
|------------------------------------------------------------|---------------|-----------|
| $Shp1+T??[?]MCn?[?]... \rightarrow Shp1P+T??[?]MCn?[?]...$ | $k_{ShpAct1}$ | 0.001     |
| $Shp1+T??[?]MCp?[?]... \rightarrow Shp1P+T??[?]MCp?[?]...$ | $k_{ShpAct2}$ | 0.0000005 |
| $Shp1P+...Cp?[?]... \rightarrow Shp1P+...Cn?[?]...$        | $k_{Cdeact3}$ | 0         |
| $Shp1P+Tpp[Zp]... \rightarrow Shp1P+Tpp[Z]...$             | $k_{ZpZ3}$    | 0         |
| $Shp1P \rightarrow Shp1$                                   | $k_{dpShp}$   | 0.0000005 |
| $Shp1P+T??[?]MC?n[n]... \rightarrow T??[?]MC?n[Shp1P]...$  | $k_{Shp}$     | 0.004     |
| $Shp1P+...Zp... \rightarrow Shp1P+...Z...$                 | $K_{ZpZ3}$    | 0         |

|                                                           |              |         |
|-----------------------------------------------------------|--------------|---------|
| $Erk+Zp \rightarrow ErkP+Zp$                              | $k_{ErkAct}$ | 0.00048 |
| $Erk+Tpp[Zp]... \rightarrow ErkP+Tpp[Zp]...$              | $k_{ErkAct}$ | 0.00048 |
| $ErkP+T??[?]MC?n[n]... \rightarrow ErkP+T??[?]MC?p[n]...$ | $k_{Cprot}$  | 50      |
| $ErkP \rightarrow Erk$                                    | $k_{dpErk}$  | 1.5     |
