# Supplementary material
Source: PubMed Central journal article supplement (PMC2141890)

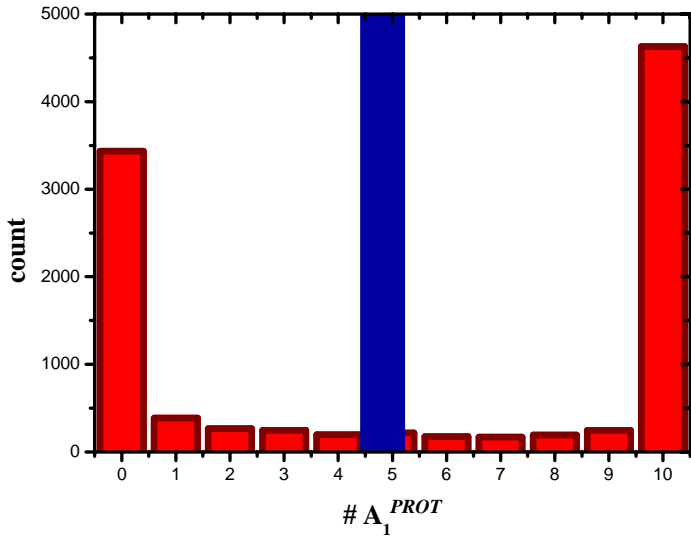

Supplement: pnas_0706110104_1.pdf [file pnas_0706110104_1.pdf]

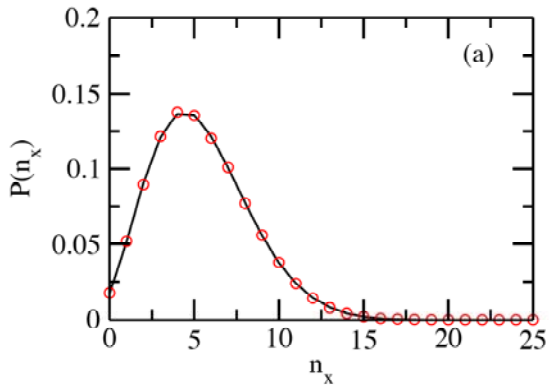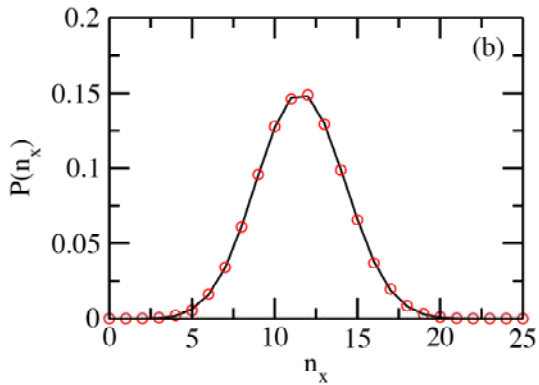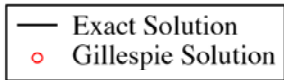

Supplement: pnas_0706110104_10.pdf [file pnas_0706110104_10.pdf]

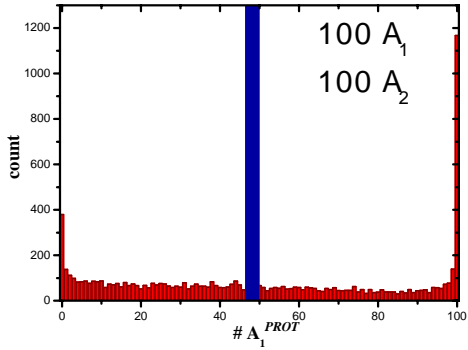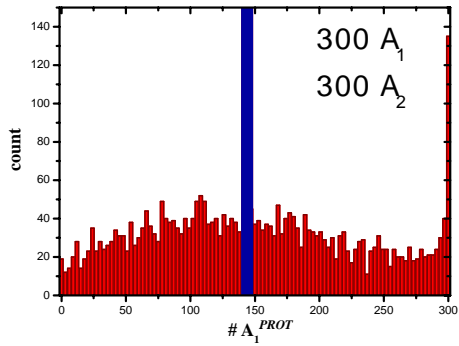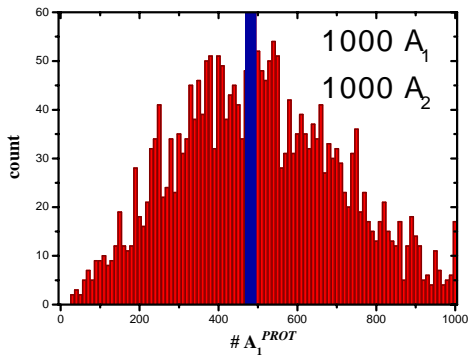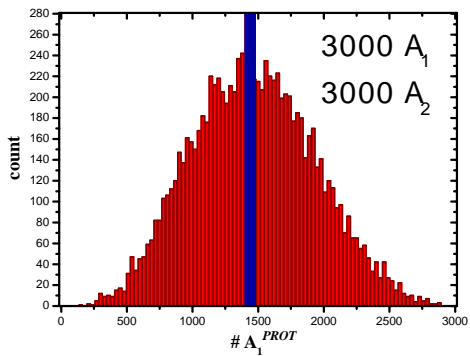

Supplement: pnas_0706110104_2.pdf [file pnas_0706110104_2.pdf]

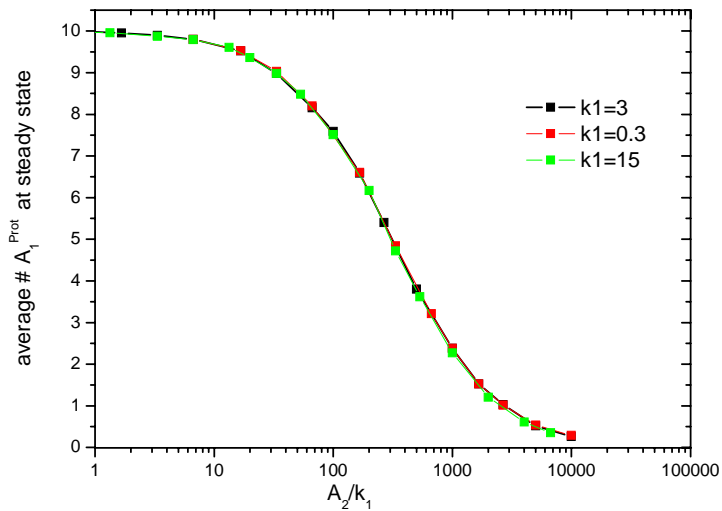

(a)

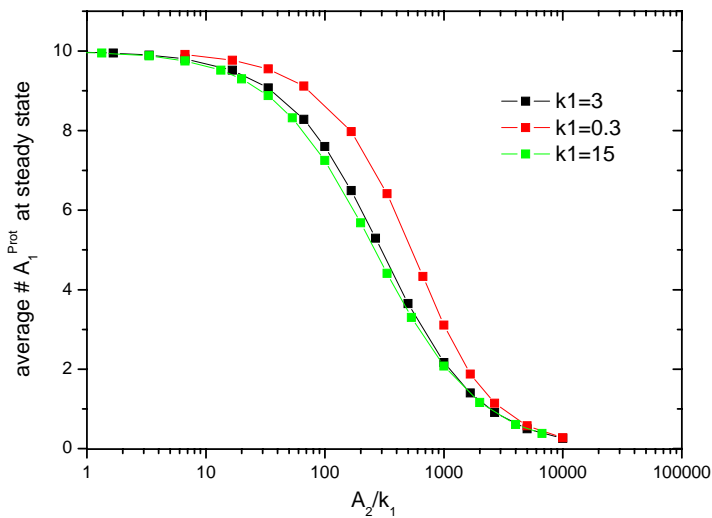

(b)

Supplement: pnas_0706110104_3.pdf [file pnas_0706110104_3.pdf]

Rate, molecule/s

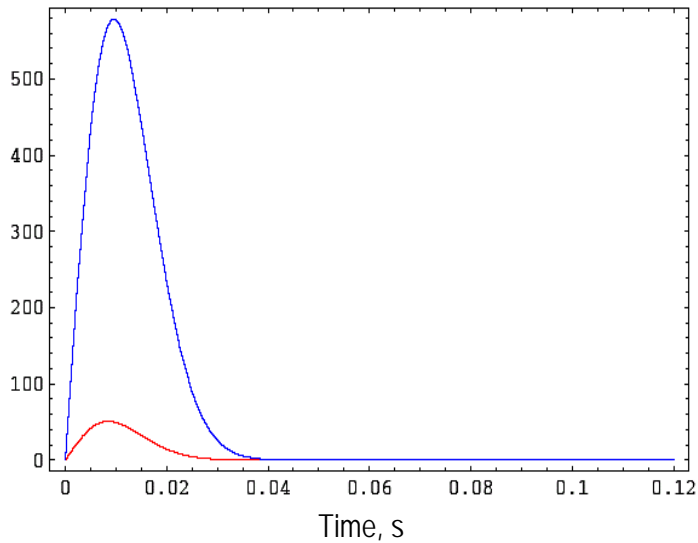

**(a)**

Rate, molecule/s

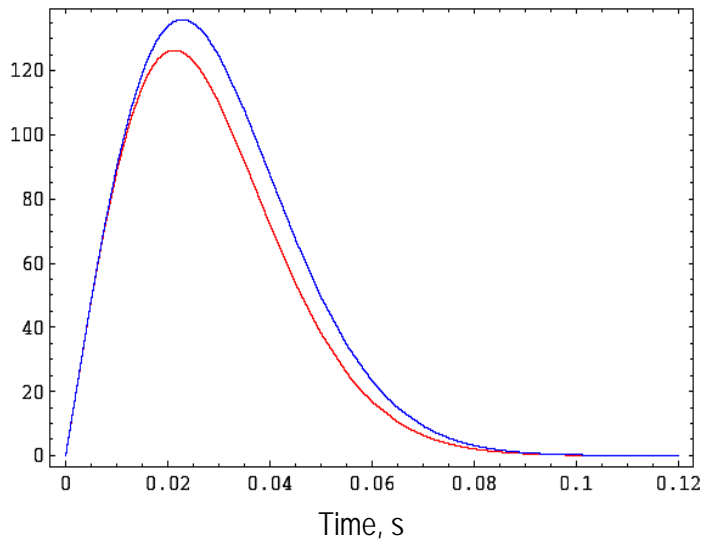

**(b)**

Supplement: pnas_0706110104_4.pdf [file pnas_0706110104_4.pdf]

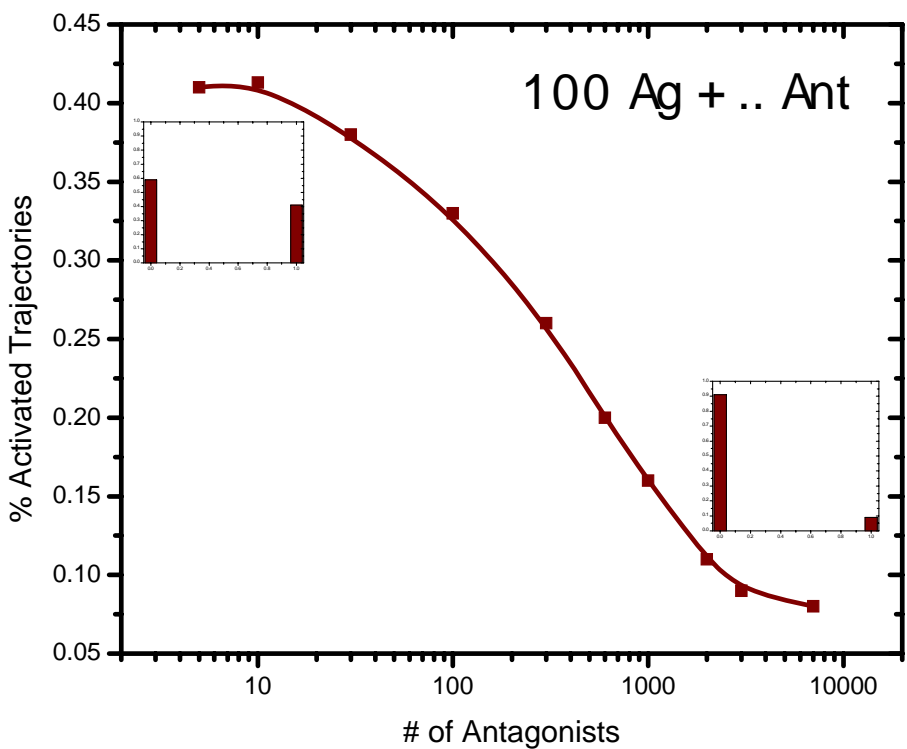

Supplement: pnas_0706110104_5.pdf [file pnas_0706110104_5.pdf]

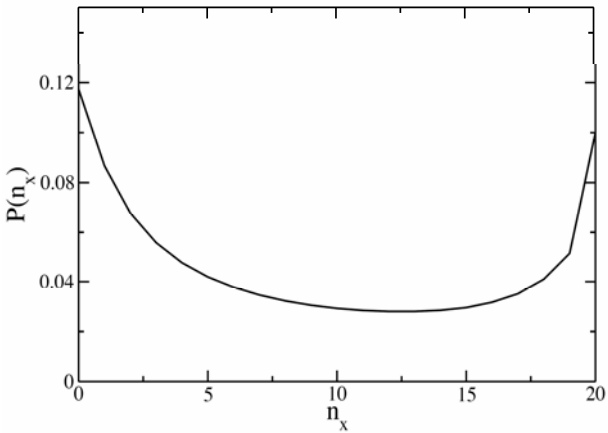

(a)

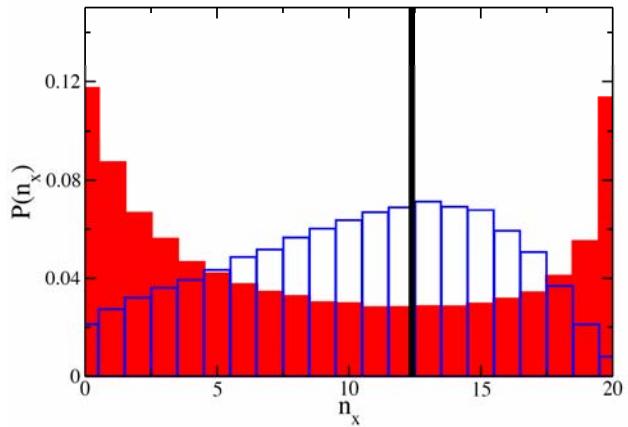

(b)

Supplement: pnas_0706110104_6.pdf [file pnas_0706110104_6.pdf]

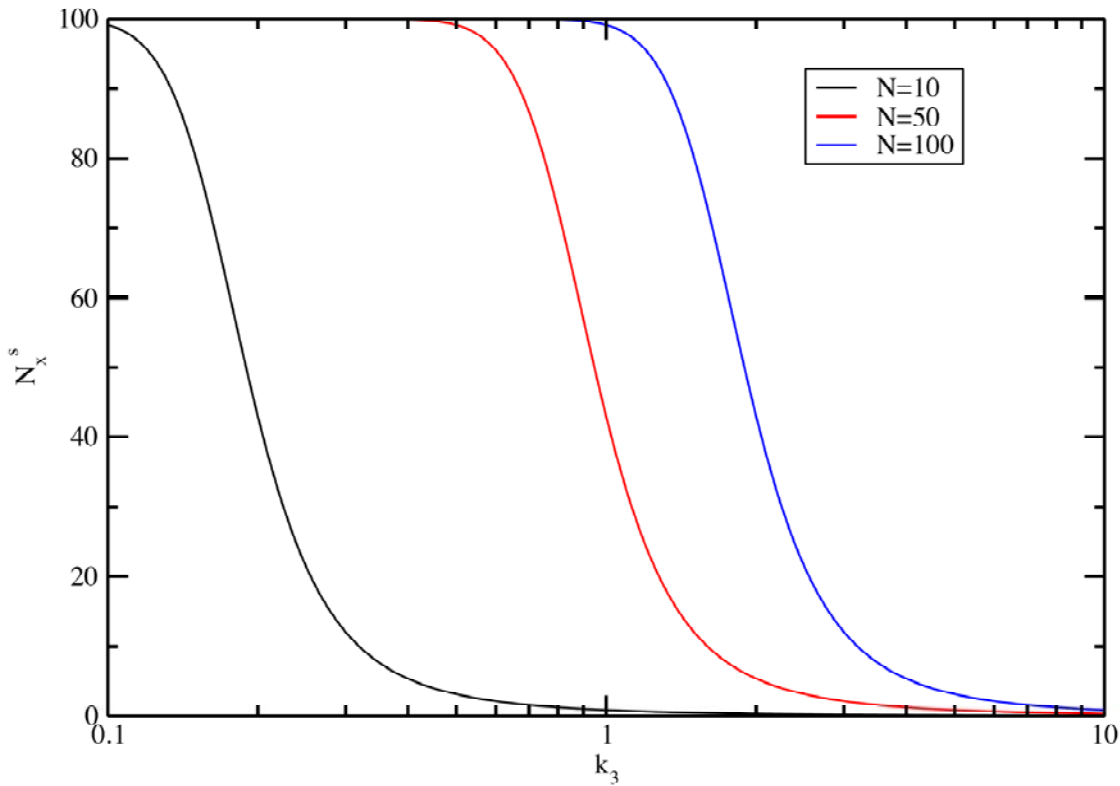

Supplement: pnas_0706110104_7.pdf [file pnas_0706110104_7.pdf]

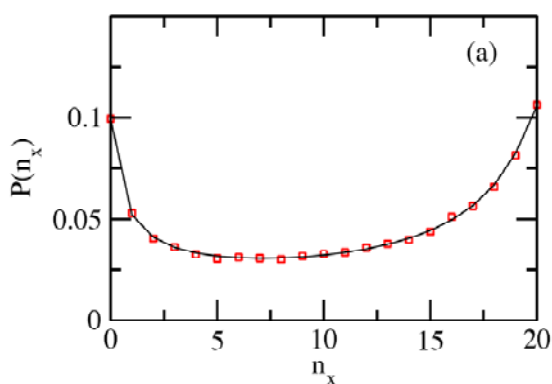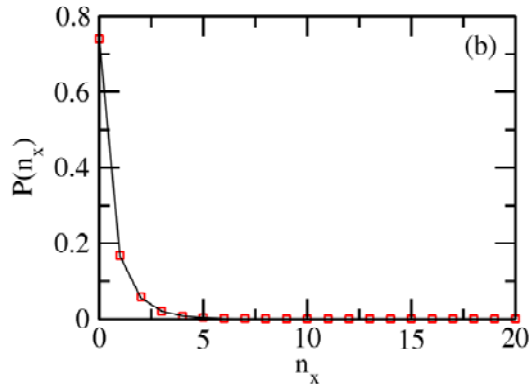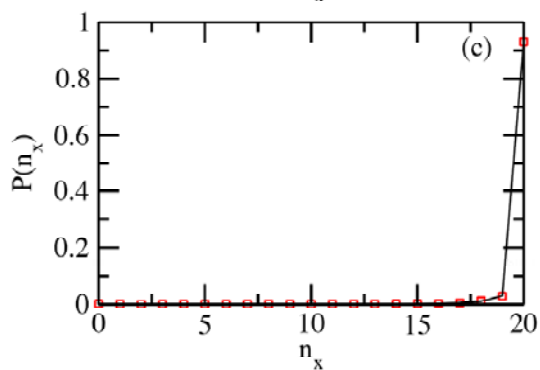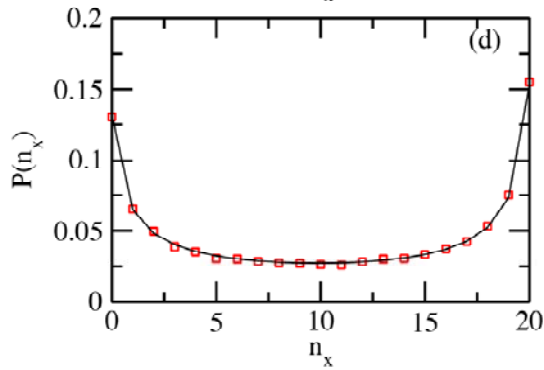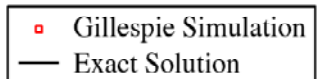

Supplement: pnas_0706110104_8.pdf [file pnas_0706110104_8.pdf]

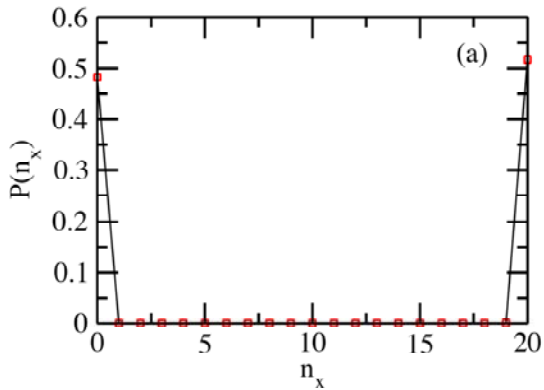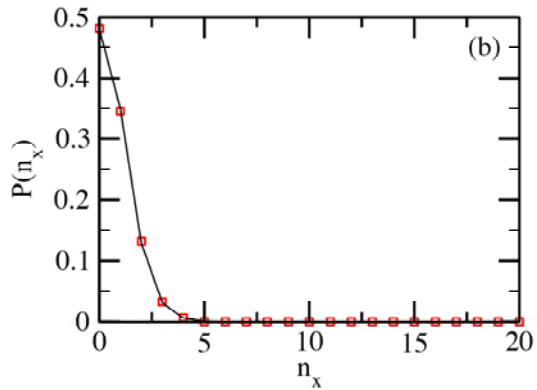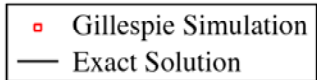

Supplement: pnas_0706110104_9.pdf [file pnas_0706110104_9.pdf]
